# Supplementary material for: Do mitochondrial properties explain intraspecific variation in thermal tolerance?
Source: Oxford University Press journal article supplement (doi:10.1242/jeb.024034), 2009-01-30
Supplement: jeb024034-sup-024034-tables1.pdf [file jeb024034-sup-024034-tables1.pdf]

Table S1. State IV, RCR (III/IV) and RCR<sub>oi</sub> (III/IV<sub>oi</sub>) rates in northern (N) and southern (S) killifish subspecies acclimated to 5, 15 or 25°C and tested at acute temperatures of 2–37°C

| Acclimation group                         | Pop | 2°C         | 5°C         | 10°C        | 15°C        | 20°C        | 25°C         | 30°C         | 35°C         | 37°C         |
|-------------------------------------------|-----|-------------|-------------|-------------|-------------|-------------|--------------|--------------|--------------|--------------|
| 5°C                                       |     |             |             |             |             |             |              |              |              |              |
| State IV                                  | N   | 9.79±2.05   | 27.70±2.66  | 45.22±3.56  | 60.71±5.28  | 79.77±17.60 | 92.93±11.97  | 106.77±12.33 | 189.17±22.24 | n/a          |
|                                           | S   | 8.05±1.94   | 23.19±3.57  | 40.25±5.41  | 60.47±2.51  | 84.80±14.64 | 173.36±15.52 | 170.07±29.64 | 283.35±18.26 | n/a          |
| RCR (III/IV)                              | N   | 12.92±1.72  | 6.99±0.72   | 6.76±0.79   | 6.07±0.43   | 6.03±0.62   | 4.81±0.48    | 5.24±1.10    | 5.71±0.59    | n/a          |
|                                           | S   | 14.88±6.48  | 7.16±1.36   | 5.37±0.61   | 4.93±0.72   | 5.94±0.47   | 5.51±0.41    | 6.67±1.40    | 3.81±0.38    | n/a          |
| RCR <sub>oi</sub> (III/IV <sub>oi</sub> ) | N   | 45.32±12.04 | 24.95±3.03  | 48.13±15.48 | 47.56±21.99 | 16.82±2.50  | 7.33±0.84    | 5.69±1.02    | 6.79±0.62    | n/a          |
|                                           | S   | 29.39±10.65 | 60.41±19.46 | 28.26±3.77  | 22.48±3.45  | 18.28±3.14  | 18.03±3.48   | 10.13±0.89   | 7.10±0.36    | n/a          |
| 15°C                                      |     |             |             |             |             |             |              |              |              |              |
| State IV                                  | N   | n/a         | 20.94±3.46  | 31.57±7.34  | 57.66±4.71  | 63.37±13.04 | 90.61±27.24  | 124.22±27.02 | 201.68±13.93 | 324.97±1.90  |
|                                           | S   | n/a         | 21.90±3.25  | 41.93±5.11  | 56.23±2.48  | 90.04±15.36 | 125.82±6.93  | 149.59±14.74 | 257.21±19.08 | 304.69±41.34 |
| RCR (III/IV)                              | N   | n/a         | 8.62±1.64   | 9.24±1.37   | 6.71±0.48   | 7.86±1.36   | 6.43±1.34    | 6.68±1.22    | 6.29±0.61    | 4.18±0.05    |
|                                           | S   | n/a         | 7.60±1.05   | 6.81±0.53   | 7.25±0.35   | 6.75±0.86   | 5.68±0.07    | 6.78±0.34    | 5.25±0.46    | 4.42±0.24    |
| RCR <sub>oi</sub> (III/IV <sub>oi</sub> ) | N   | n/a         | 47.31±14.89 | 35.39±1.62  | 26.45±2.12  | 19.54±3.21  | 12.78±0.91   | 9.94±1.92    | 9.27±1.32    | 7.31±1.64    |
|                                           | S   | n/a         | 58.97±44.99 | 30.89±3.88  | 21.67±1.68  | 20.24±4.85  | 14.65±2.87   | 11.45±1.62   | 8.53±0.90    | 7.26±0.41    |
| 25°C                                      |     |             |             |             |             |             |              |              |              |              |
| State IV                                  | N   | 7.54±1.53   | 13.93±1.84  | 27.08±4.88  | 44.33±5.10  | 87.90±23.25 | 90.85±9.96   | 127.27±35.08 | 177.34±25.17 | 298.58±14.98 |
|                                           | S   | 6.75±3.22   | 10.87±3.39  | 27.68±7.72  | 42.15±2.82  | 95.15±14.92 | 130.03±9.32  | 144.28±52.09 | 314.57±64.27 | 341.86±30.94 |
| RCR (III/IV)                              | N   | 12.26±3.66  | 8.49±0.59   | 9.04±2.03   | 7.27±0.92   | 5.45±1.03   | 6.46±0.71    | 6.21±0.10    | 6.05±0.95    | 4.55±0.00    |
|                                           | S   | 7.79±3.42   | 8.65±3.29   | 6.91±2.06   | 5.38±0.70   | 4.08±0.34   | 4.01±0.28    | 5.31±1.01    | 3.75±0.12    | 3.71±0.38    |
| RCR <sub>oi</sub> (III/IV <sub>oi</sub> ) | N   | 57.80±30.56 | 12.98±2.20  | 14.80±0.92  | 18.06±1.34  | 14.57±2.43  | 12.68±1.71   | 12.75±3.32   | 7.27±0.51    | 5.51±0.50    |
|                                           | S   | 18.58±3.52  | 14.04±5.60  | 24.35±4.27  | 13.45±2.46  | 13.02±1.69  | 10.41±1.86   | 10.55±1.12   | 5.79±0.72    | 4.58±0.42    |

Data are expressed as means ± s.e.m. (N=4–6).
